# Supplementary material for: Dietary squalene modifies plasma lipoproteins and hepatic cholesterol metabolism in rabbits
Source: Royal Society of Chemistry journal article supplement (doi:10.1039/d0fo01836h), 2021-01-01
Supplement: d0fo01836h1.pdf [file d0fo01836h1.pdf]

**Supplementary Table 1. Characteristics of primers used in RT-qPCR according to MIQE guidelines.**

| <b>Gene symbol</b> | <b>Accession</b> | <b>Sequence</b>                                                     | <b>Amplicon length</b> | <b>Exons</b> | <b>Primer nM</b> | <b>Efficiency</b> |
|--------------------|------------------|---------------------------------------------------------------------|------------------------|--------------|------------------|-------------------|
| <b>Rabbit</b>      |                  |                                                                     |                        |              |                  |                   |
| <i>APOB</i>        | XM_008254783.2   | Sense: CTGTCCAAAAGATGCCACGC<br>Antisense: GATGCACTGGTTGGTCCTCA      | 181                    | 2/4          | 100              | 105%              |
| <i>HMGCR</i>       | XM_017339036.1   | Sense: GTGCGCCAGCTTGAAATCAT<br>Antisense: ACACCAAGGACACACAAGCA      | 97                     | 7            | 100              | 102%              |
| <i>LDLR</i>        | NM_001278865.1   | Sense: AGCAACCGCATCTACTGGTC<br>Antisense: TGCTGATGACGGTGTCGTAG      | 101                    | 10/11        | 100              | 108%              |
| <i>CYP7A1</i>      | NM_001170929.1   | Sense: GTTCAGAGACACCCTTGCTTT<br>Antisense: CATCCTTTCTCCAGAGGTGGT    | 179                    | 3/4          | 100              | 103%              |
| <i>SQLE</i>        | XM_017341522.1   | Sense: TATGGCAGAGCCCAACACAA<br>Antisense: GGAGAAAAGCCCATCTGCAA      | 157                    | 3/6          | 100              | 99%               |
| <i>RN18S</i>       | NR_033238.1      | Sense: ACTCAACACGGGAAACCTCA<br>Antisense: AATCGCTCCACCAACTAACA      | 114                    | 1            | 100              | 102%              |
| <b>Mouse</b>       |                  |                                                                     |                        |              |                  |                   |
| <i>Casp1</i>       | NM_009807.2      | Sense: CTATGGACAAGGCACGGGAC<br>Antisense: TCCTGCCAGGTAGCAGTCTT      | 107                    | 2            | 200              | 91%               |
| <i>Gpx4</i>        | NM_001367995.1   | Sense: ATGGATGAAAGTCCAGCCCAAG<br>Antisense: CGGCAGGTCCTTCTCTATCAC   | 148                    | 4/7          | 100              | 104%              |
| <i>Pipb</i>        | NM_011149        | Sense: GGAGATGGCACAGGAGGAA<br>Antisense: GTAGTGCTTCAGCTTGAAGTTCTCAT | 72                     | 3/4          | 300              | 103%              |
| <i>Tbp</i>         | NM_013684.3      | Sense: GTGAGTTGCTTGCTCTGTGC<br>Antisense: GCTGCGTTTTTGTGCAGAGT      | 359                    | 8            | 200              | 104%              |
