# Supplementary material for: Dietary squalene modifies plasma lipoproteins and hepatic cholesterol metabolism in rabbits
Source: Royal Society of Chemistry journal article supplement (doi:10.1039/d0fo01836h), 2021-01-01
Supplement: d0fo01836h2.pdf [file d0fo01836h2.pdf]

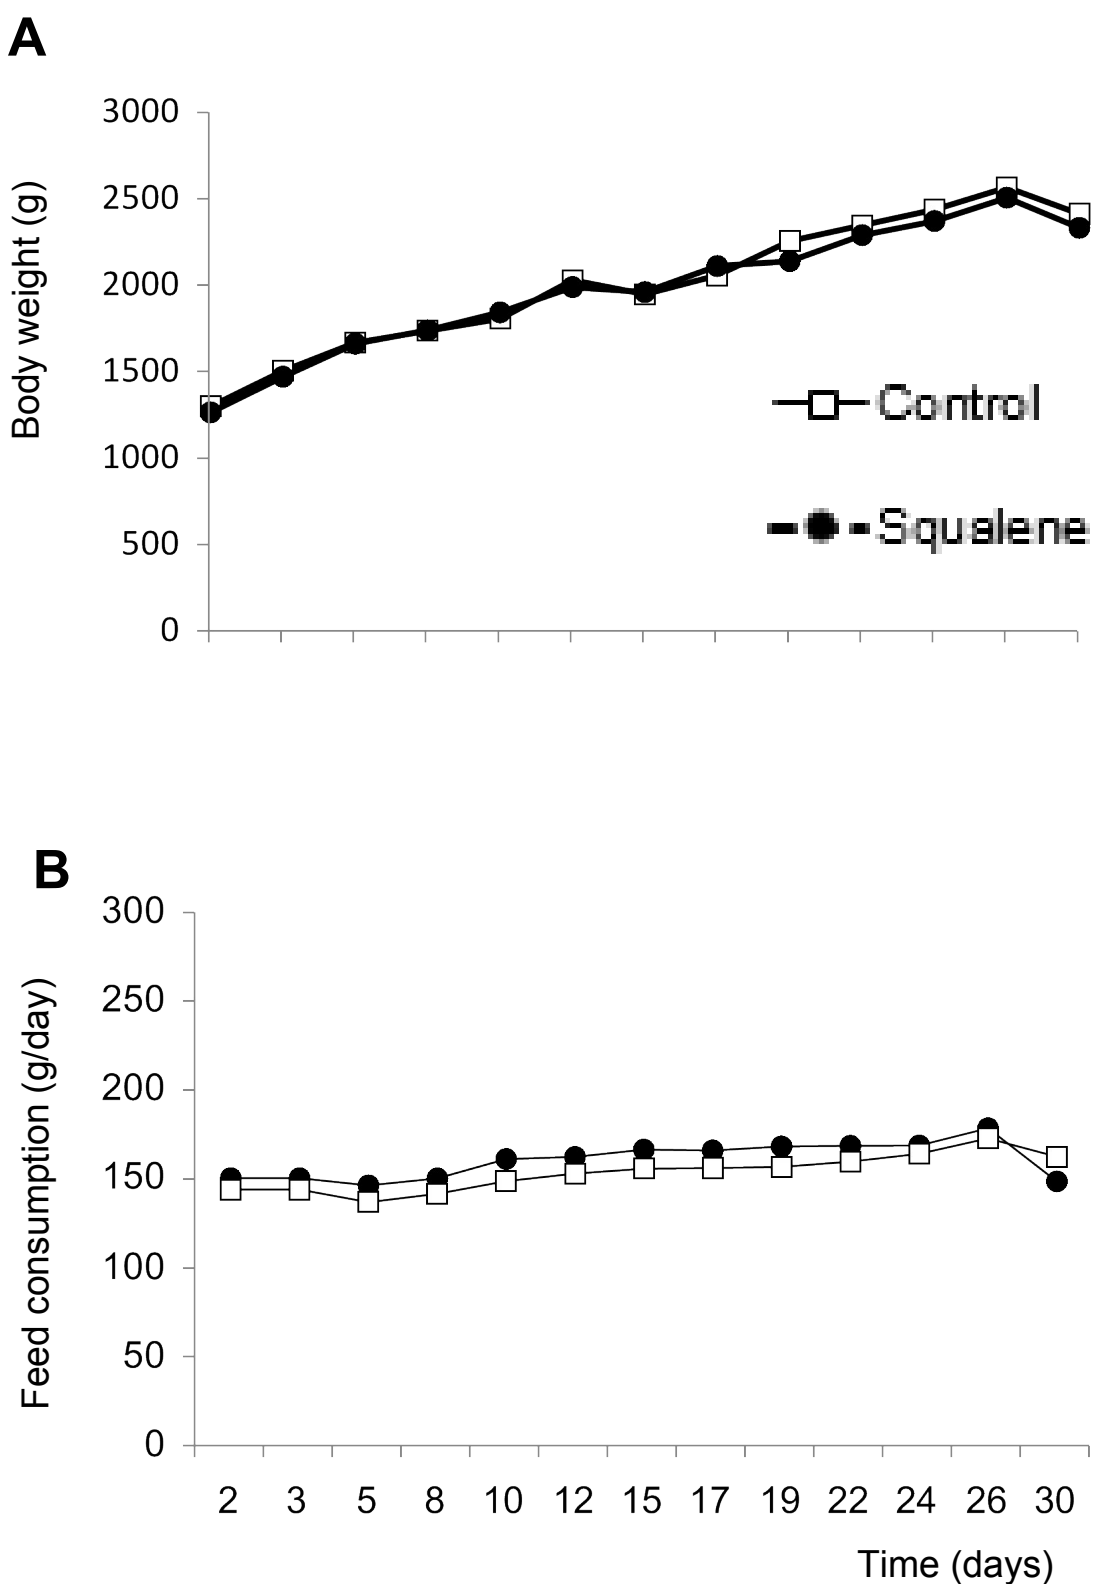

**Supplemental Figure 1.** Follow-up of body weight during diet intervention (A) and solid intake (B). Data are means  $\pm$  SD for each group. Statistical analyses were carried out by t-test.
